# Supplementary material for: Multiple eco-regions contribute to the seasonal cycle of Antarctic aerosol size distributions
Source: Copernicus journal article supplement (doi:10.5194/egusphere-2024-987), 2024-05-06
Supplement: Supplementary file 1 [file egusphere-2024-987-supplement.pdf]

SUPPORTING INFORMATION

|                 | Marambio | King Sejong | Halley | Concordia/<br>Dome C |
|-----------------|----------|-------------|--------|----------------------|
| Nucleation slow | 4.7      | 1.6         | 0.6    | 0.0                  |
| Nucleation fast | 8.3      | 1.9         | 0.9    | 0.7                  |
| Nucleation weak | 12.2     | 4.5         | 1.2    | 1.4                  |
| Bursting strong | 8.7      | 11.3        | 2.8    | 4.1                  |
| Bursting weak   | 14.2     | 8.7         | 0.6    | 0.7                  |
| Aitken high 30  | 8.3      | 13.2        | 5.2    | 5.5                  |
| Aitken high 35  | 1.2      | 4.8         | 3.1    | 7.6                  |
| Aiten high 25   | 11.0     | 3.5         | 3.1    | 0.0                  |
| Aitken low 35   | 7.1      | 9.7         | 11.3   | 9.7                  |
| Aitken low 45   | 2.4      | 3.2         | 8.9    | 9.7                  |
| Aitken low 55   | 0.4      | 0.6         | 9.2    | 14.5                 |
| Bimodal 1       | 3.1      | 12.9        | 3.1    | 3.4                  |
| Bimodal 2       | 1.6      | 3.5         | 4.9    | 30.3                 |
| Pristine 65     | 10.6     | 11.9        | 12.0   | 5.5                  |
| Pristine 85     | 3.9      | 6.8         | 21.2   | 3.4                  |
| Pristine 160    | 2.4      | 1.6         | 12.0   | 3.4                  |

5

Table S1: Percentage of the total number of measurements corresponding to each of the 16 original clusters at each site

15

| Category    | Marambio | King Sejong | Halley | Concordia/<br>Dome C |
|-------------|----------|-------------|--------|----------------------|
| Nucleation  | 25.2     | 8.1         | 2.8    | 2.1                  |
| Bursting    | 22.8     | 20.0        | 3.4    | 4.8                  |
| Aitken low  | 9.8      | 13.5        | 29.4   | 33.8                 |
| Aitken high | 20.5     | 21.6        | 11.3   | 13.1                 |
| Bimodal     | 4.7      | 16.5        | 8.0    | 33.8                 |
| Pristine    | 16.9     | 20.3        | 45.1   | 12.4                 |

Table S2: Percentage of the total number of measurements corresponding to each of 6 clusters at each site

20

25

30

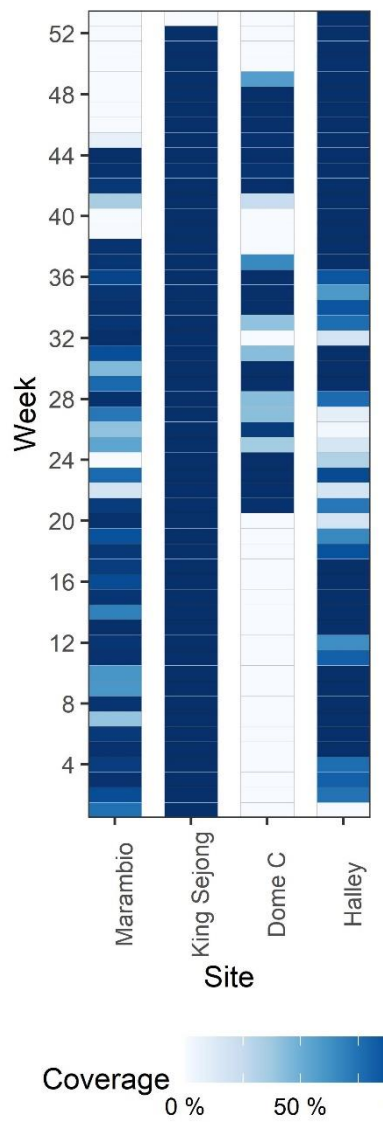

35 Figure S1: Data coverage per week for each of the four Antarctic sites.

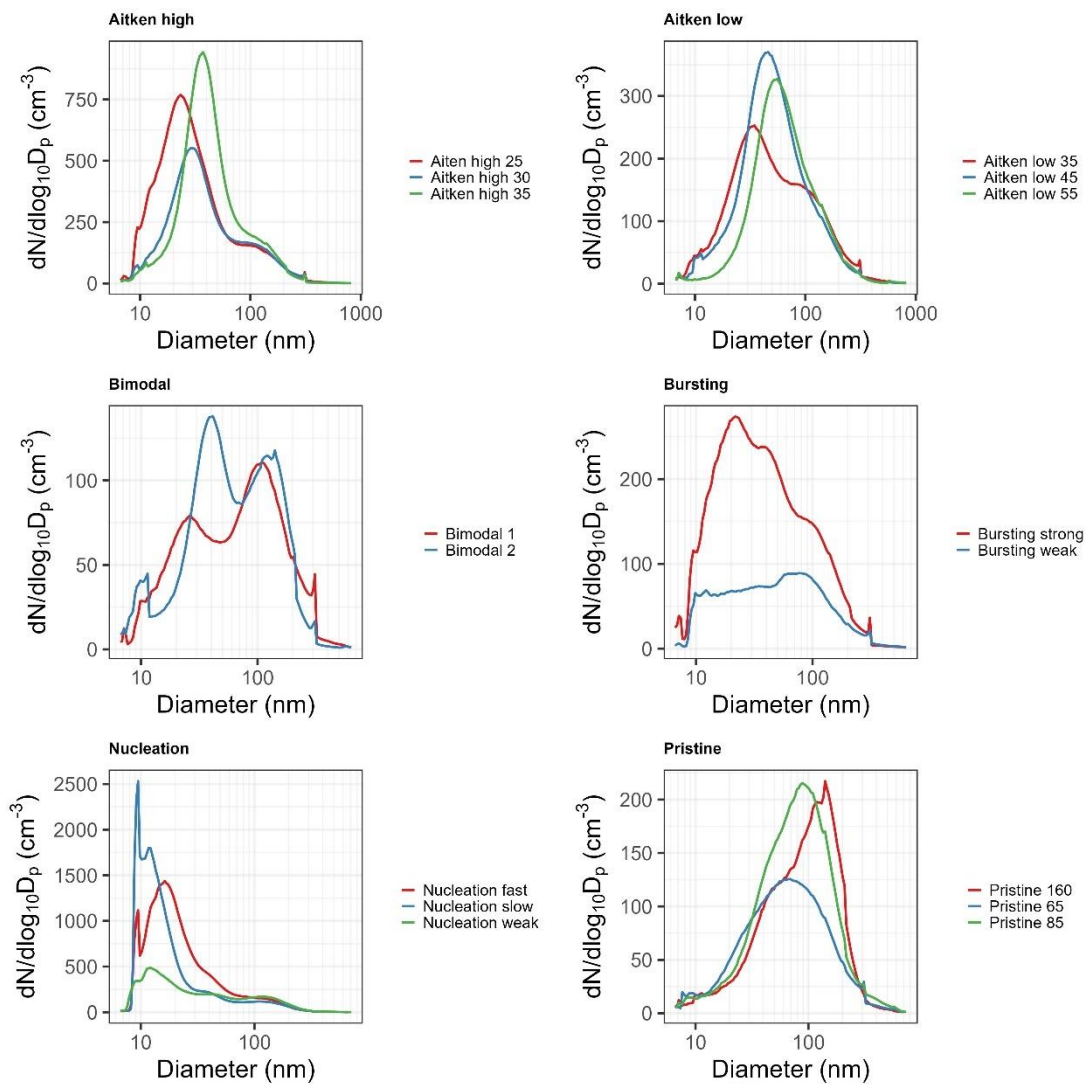

Figure S2: Mean PSD for each of the 16 clusters produced by cluster analysis. Each panel represents a group into which these were then compiled for later analyses.

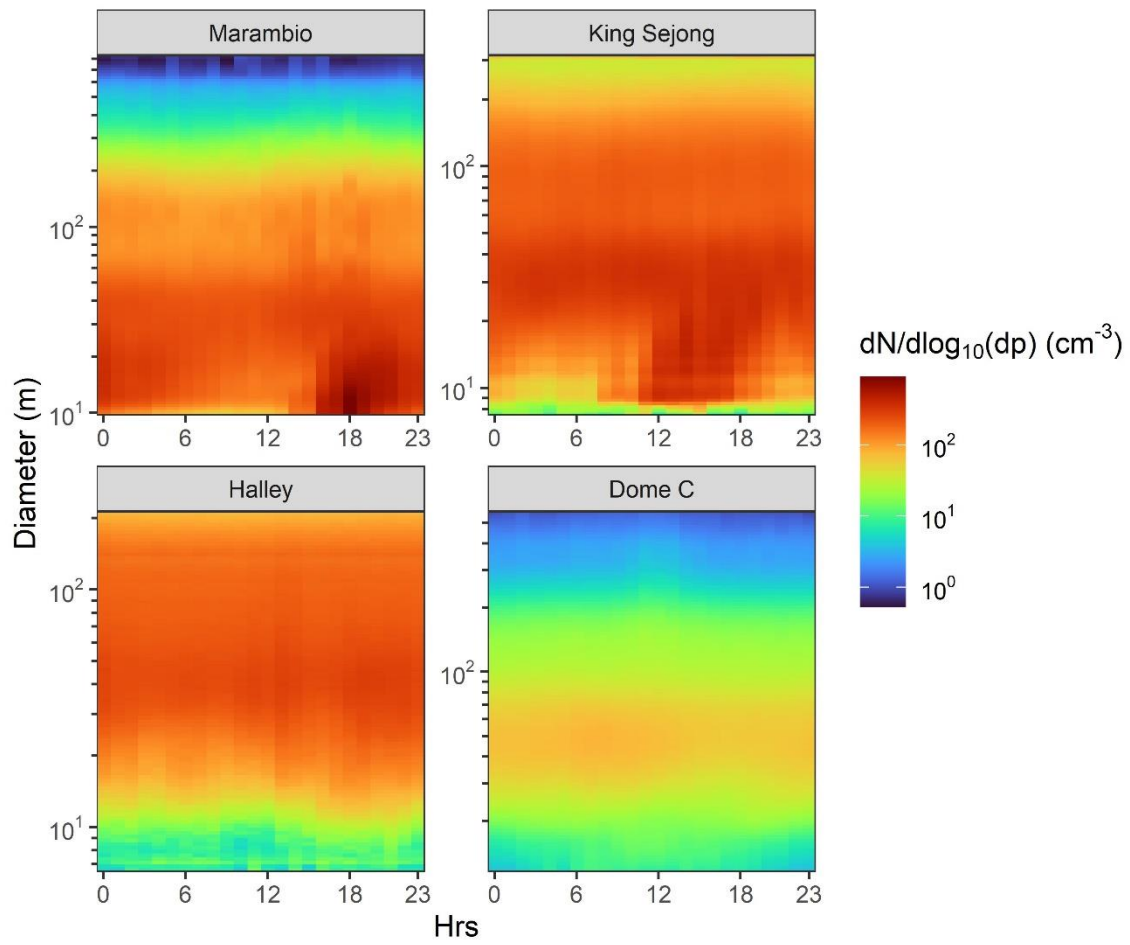

Figure S3: Mean 24-hour particle number PNSD contour plots for each of the four  
 45 Antarctic sites in this study

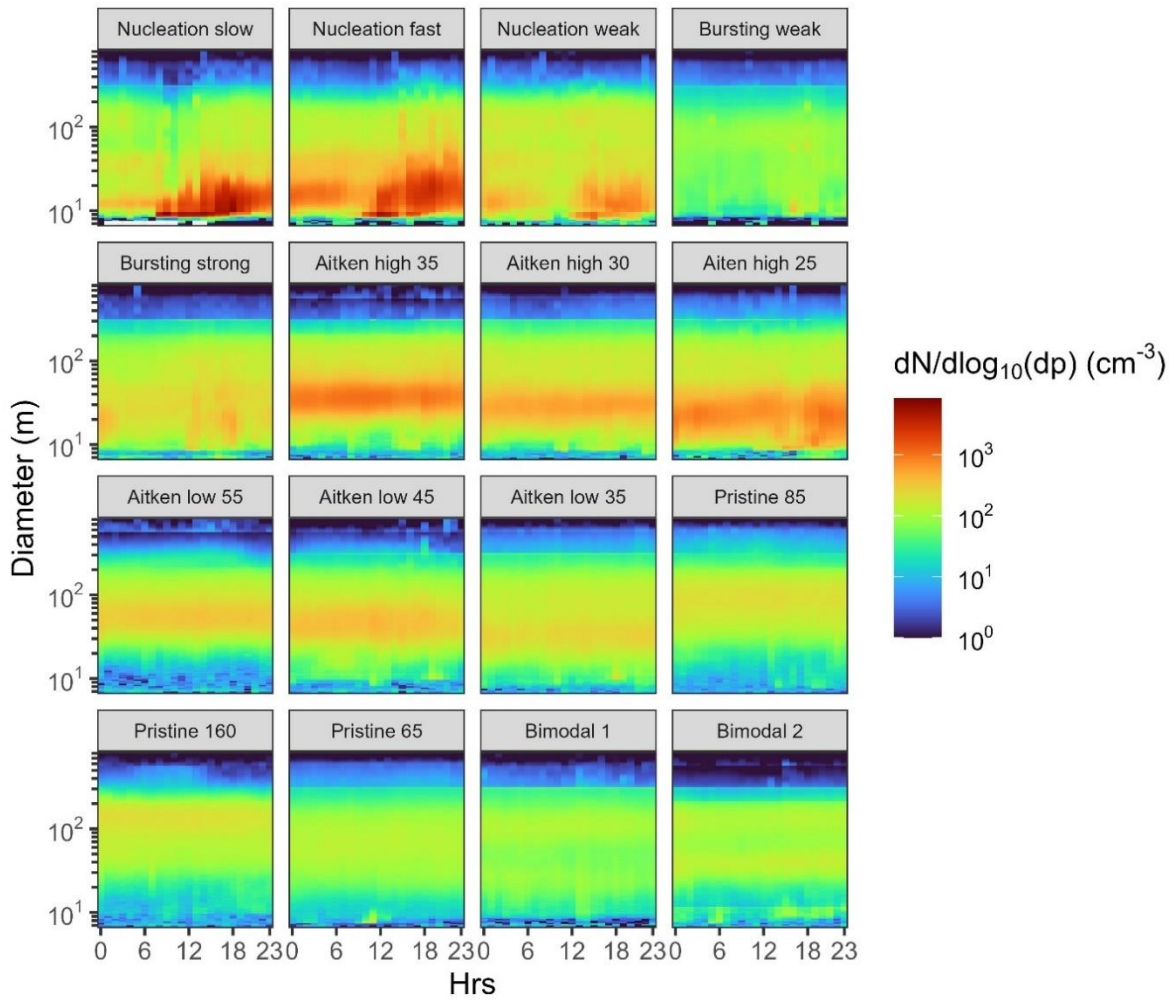

Figure S4: Mean diurnal cycle in the PNSD for all of the 16 clusters.

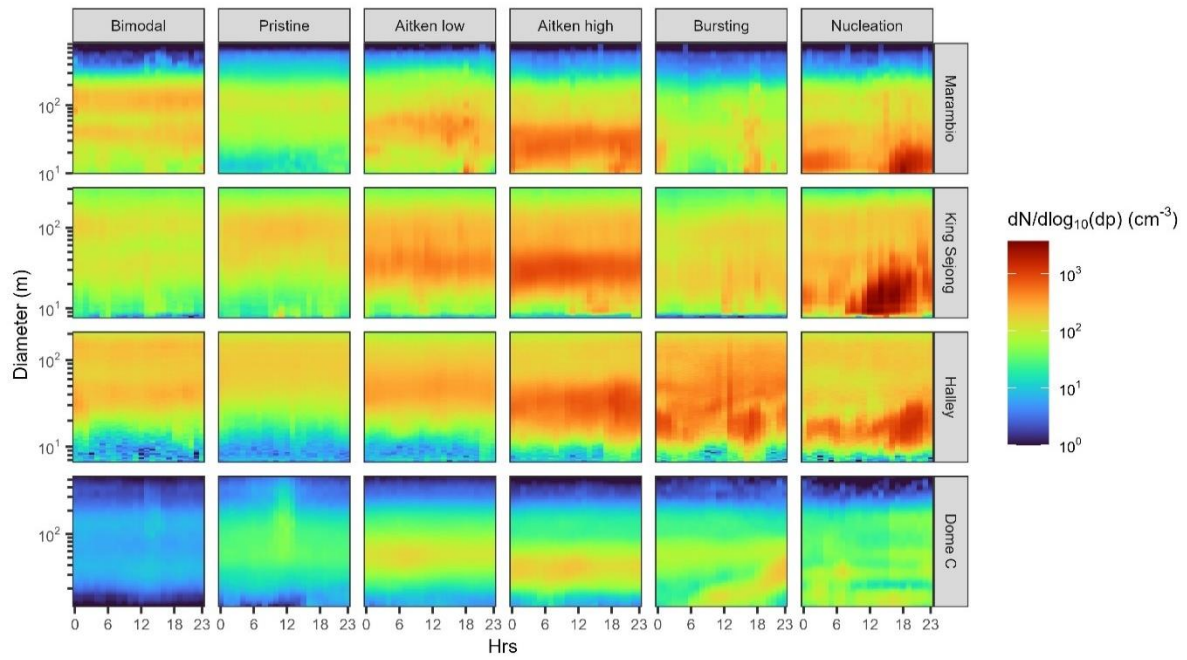

60 Figure S5: Mean diurnal cycle in the PNSD for each of the four Antarctic sites in this study, separated by clusters.

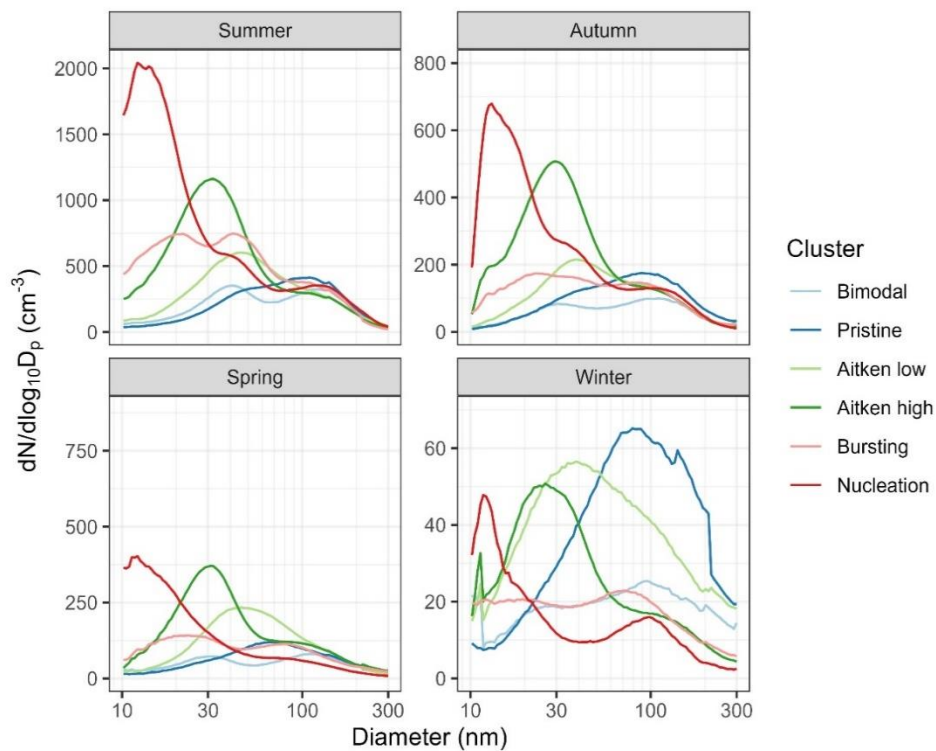

65 Figure S6: PNSD clusters separated by Austral season. Range 10 – 300 nm shown (where data is common between sites). Figure S6: PNSD clusters separated by Austral season. Range 10 – 300 nm shown (where data is common between sites). Summer: December to February; Autumn: March to May; Winter: June to August; Spring: September to November

70

75



80

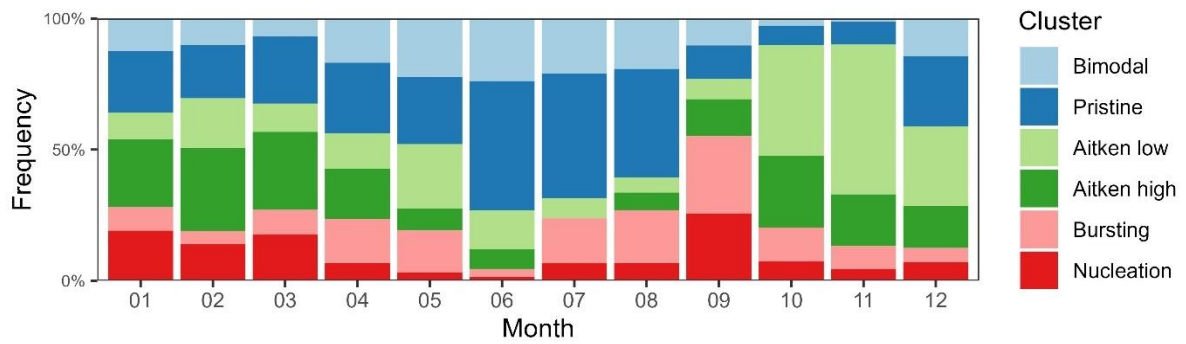

Figure S7: Relative mean monthly contribution of each cluster per month across all sites

85

90

95

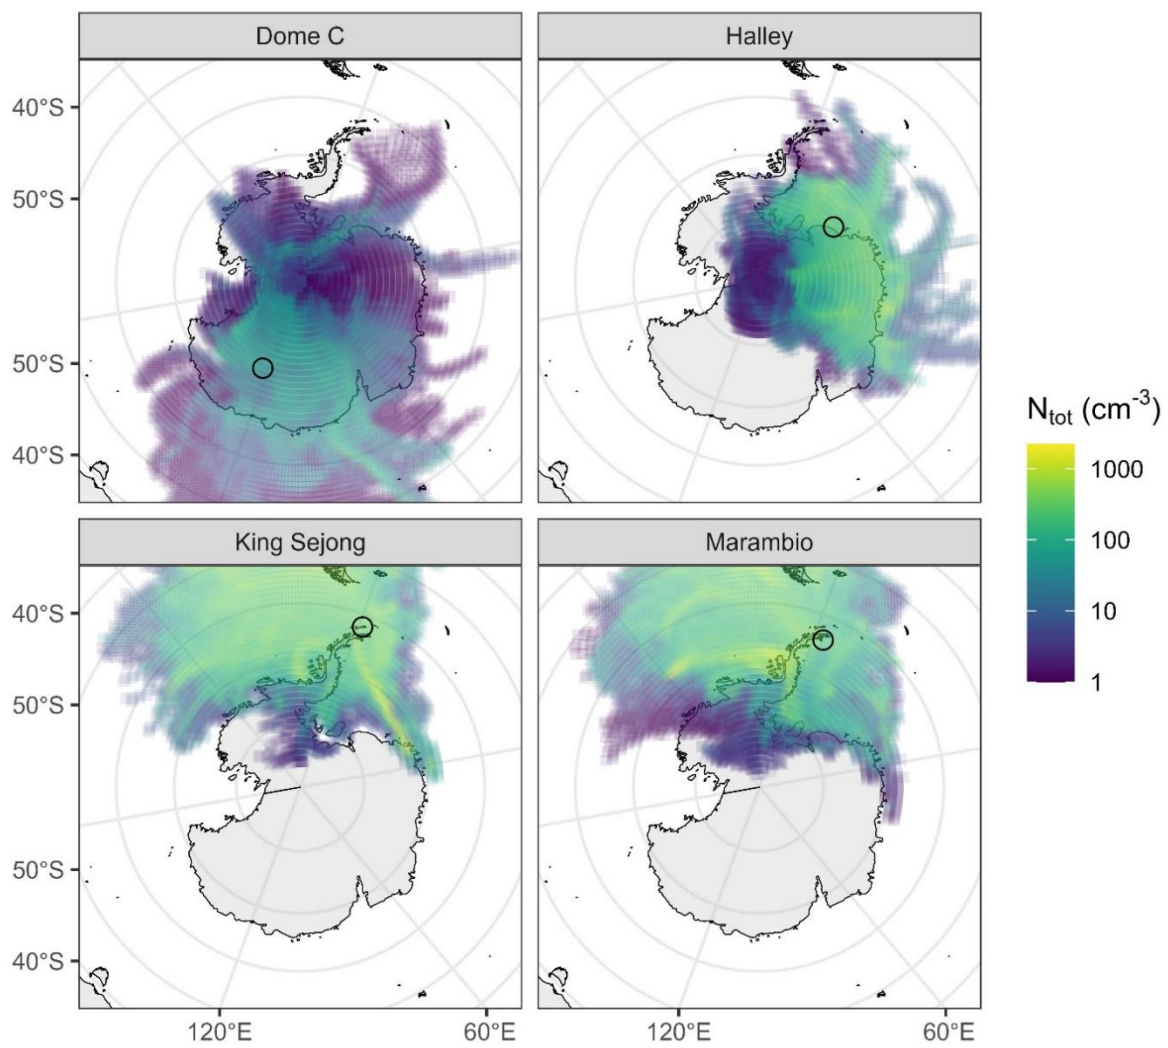

Figure S8: Particle number CWTs of 72 hour air mass trajectories for each site. Trajectories calculated with HYSPLIT.

110

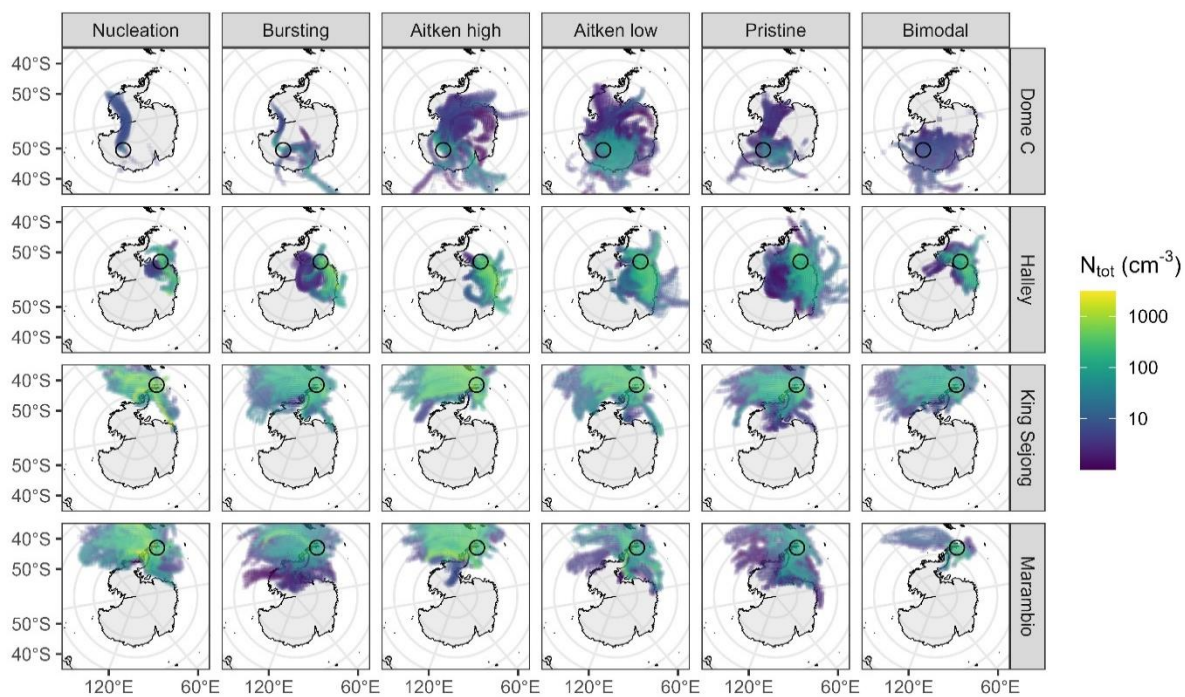

Figure S9: Particle number CWTs of 72 hour air mass trajectories for each cluster for each site. Trajectories calculated with HYSPLIT.

115

120

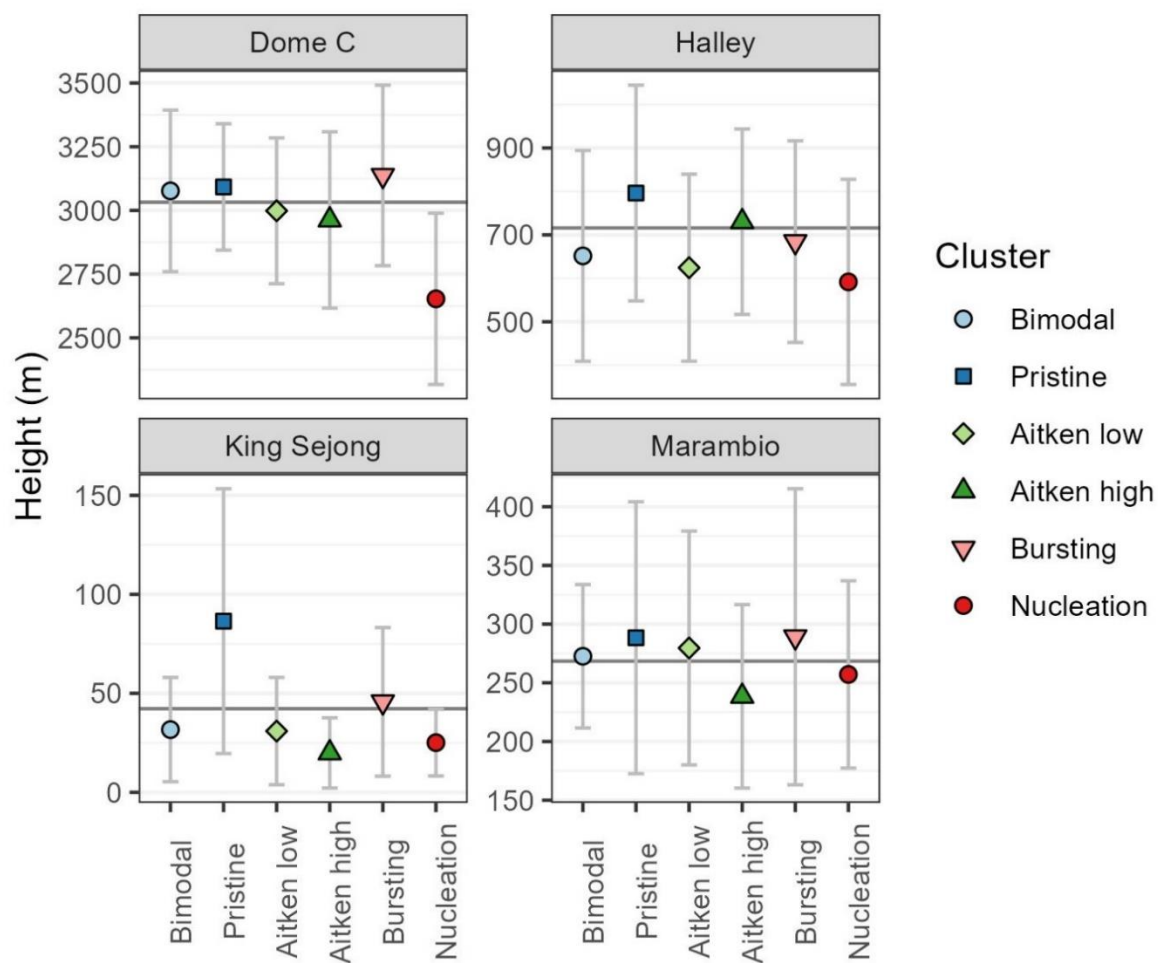

Figure S10: Mean trajectory height for 72 hour back trajectories per cluster per site. Error bars indicate 1 standard error. Horizontal line represents mean trajectory height.

130 Trajectories calculated with HYSPLIT.
