# Supplementary material for: Multiple eco-regions contribute to the seasonal cycle of Antarctic aerosol size distributions
Source: Copernicus journal article supplement (doi:10.5194/egusphere-2024-987), 2024-05-06
Supplement: Supplementary file [file egusphere-2024-987-AC2-supplement.pdf]

1 **Multiple eco-regions contribute to the seasonal cycle of Antarctic aerosol size**  
2 **distributions, response to reviewers.**

3 Note: Review comments are displayed in black, our responses to those comments are  
4 coloured blue and sections that from the manuscript are coloured green. We thank the  
5 reviewers for their insightful comments and provide responses below.

6 **Reviewer: 1**

7 This paper presents the results of k-means cluster analysis on the particle number size  
8 distributions (PNSDs) measured at 4 different Antarctic research stations. It is an extension of  
9 the work in Lachlan-Cope et al., ACP, 2020 which applied this analysis to the same year of  
10 PNSD data from one of the stations (Halley). Applying cluster analysis to the combined data  
11 is an interesting idea but it is not clear what new insights are gained. In addition, a lot of the  
12 material in the discussion and conclusion sections seems more like introductory material. I  
13 would suggest restructuring the paper to move all introductory material to the introduction  
14 and to make clearer in the discussion what new information is gained from the combined  
15 cluster analysis. Specific comments are:

16 Major comments:

- 17 1. Please be specific about new insights gained from this analysis. Is it confirmation of the  
18 cluster types observed in Lachlan-Cope et al. (2020). That paper found 8 clusters and  
19 this one finds 6, so a comparison of the two sets of clusters would be helpful. Is there  
20 new information about the source of a particular cluster type? If so, please add this to  
21 the discussion.

22 Thank you for the comment. The new insights from this paper are 1) the direct comparison of  
23 simultaneous PNSD data, where we show that coastal sites are dominated by the nucleation  
24 mode relative to the inland site, and that particle counts are greatest in the peninsula; 2) the  
25 insights from cluster analyses, which let us see the yearly cycle of NPF-dominated and  
26 primary-dominated clusters at each site; 3) the relation of these clusters to air mass back  
27 trajectories, where we show that NPF is more related to sea ice than other clusters are, and  
28 highlights the Bellingshausen sea as an NPF hotspot. This paper builds on Lachlan-Cope et  
29 al. (2020) by extending the analyses to four sites. It is not a confirmation.

30 Cluster analyses produce a large number of clusters which we then recombine into a smaller  
31 number. Lachlan-Cope et al. (2020) decide to not combine the three “pristine” clusters, but in  
32 our analyses we decided to do so as they follow the same trend. We state the following in the  
33 methods:

34 “These were assigned into 6 categories typical of Antarctic PNSDs (Lachlan-Cope et al.,  
35 2020). Compared to previous work, we combined the three “pristine” clusters identified by  
36 Lachlan-Cope et al. (2020) into one, as they follow the same seasonal trend, producing 6  
37 clusters instead of 8.”

38 Further, to highlight the novel findings of the study, we have changed the abstract to read as  
39 follows

40 *“In order to reduce the uncertainty of aerosol radiative forcing in global climate models, we*  
41 *need to better understand natural aerosol sources which are important to constrain the current*

42 *and pre-industrial climate. Here, we analyze Particle Number Size Distributions (PNSD)*  
43 *collected during a year (2015) across four coastal and inland Antarctic research bases (Halley,*  
44 *Marambio, Dome C and King Sejong). We utilise k-means cluster analysis to separate the*  
45 *PNSD data into six main categories. Nucleation and Bursting PNSDs occur 28-48% of the time*  
46 *between sites, most commonly at coastal sites Marambio and King Sejong where air masses*  
47 *mostly come from the west and travel over extensive regions of sea ice, marginal ice, and open*  
48 *ocean, and likely arise from new particle formation. Aitken high, Aitken low, and bimodal*  
49 *PNSDs occur 37-68% of the time, most commonly at Dome C on the Antarctic Plateau, and*  
50 *likely arise from atmospheric transport and aging from aerosol originating likely in both*  
51 *coastal boundary layer and free troposphere. Pristine PNSDs with low aerosol concentrations*  
52 *occur 12-45% of the time, most common at Halley located at low altitudes and far from the*  
53 *coastal melting ice and influenced by air masses from the west. We infer that both primary and*  
54 *secondary components from pelagic and sympagic regions strongly contribute to the annual*  
55 *seasonal cycle of Antarctic aerosols. Our simultaneous aerosols measurements stress the*  
56 *importance of the variation in atmospheric biogeochemistry across the Antarctic region.”*

57 2. The paragraph from line 601 to line 625, the dangling sentence on lines 626 to 628, and  
58 the paragraphs from line 662 to line 691 do not seem like material that is about  
59 interpreting the results in this paper. Rather this seems like broad overview material that  
60 should be combined with the introduction.

61 Great suggestion, thanks, we have moved these paragraphs.

62 3. I don't understand what Figure 7 adds to the discussion. Everything is the same between  
63 summer and winter except with slightly more snow and sea ice in the winter. Perhaps  
64 the goal was to show that boundary layer NPF does not contribute as much in winter,  
65 but the symbol is really hard to see. Why are the panels slanted? Is the sun shining in  
66 winter or is that supposed to be the moon?

67 Figure 7 illustrates the geographic and biological variation both spatially across Antarctica as  
68 well as seasonally. Regarding the findings in our study it shows 1) the increase of NPF and  
69 dominance of secondary aerosols in the summertime; 2) the dominance of primary aerosols  
70 in-land versus at the coast. More generally it shows 1) the sea ice retreat in the summer,  
71 increasing marine emissions; 2) Reduced terrestrial biological activity in the summertime; 3)  
72 darkening in the wintertime. We argue figure 7 ties our arguments regarding Antarctic  
73 aerosols together. In the text we now state

74 “Figure 7 shows a schematic illustration of the sea ice, microbiota, sea-to-air emissions, and  
75 primary and secondary aerosols in Antarctica. Figure 7 highlights the dominance of NPF in  
76 summertime PNSDs, and a dominance of primary aerosols during the wintertime, with these  
77 primary aerosols being more prevalent inland than at the coast, a key finding of this study. It  
78 also highlights the retreat of sea ice in the summer, leading to increased marine emissions,  
79 alongside a reduction in terrestrial biological activity and sunlight intensity during winter  
80 months.”

81 4. I find Figure 5 really hard to interpret with backtrajectories from all of the stations  
82 overlapping. I would move Figure S9 to the main body of the paper and skip Figure 5.

83 Thanks for the suggestion, we have done this and updated the text accordingly. We agree the  
84 following sections make much more sense following this format.

85 “Our CWT analysis grids back trajectories to 1x1 degree squares and weighs each segment of  
86 the back trajectory with the corresponding  $N_{\text{tot}}$  observed upon the air mass's arrival,  
87 performed individually for each PNSD cluster. These are plotted in Figure 5. A map  
88 highlighting source regions for  $N_{\text{tot}}$  unseparated by cluster per site is shown in Figure S8. The  
89 CWTs aggregated together for each site are shown in Figure S9. Mean heights of these  
90 trajectories are shown in Figure S10.”

91 Minor comments:

- 92 1. The paragraph in lines 196 to 205 is confusing. The first part talks about wintertime  
93 PNSDs at Halley and the second part talks about NMR analysis from a summertime  
94 cruise. How are they related?

95 The intent was to discuss primary aerosol sources. We have reworded it as follows (major  
96 changes in bold)

97 “Previous analyses of PNSDs at Halley using k-means cluster analysis has shown that  
98 wintertime PNSDs were characterised by extremely low particle concentrations, with a  
99 bimodal PNSD appearing with a blowing snow or sea spray origin (Lachlan-Cope et al.,  
100 2020). The Antarctic wintertime at this site is therefore mostly devoid of secondary aerosol  
101 sources **and is instead dominated by primary sources. Some of these primary aerosols**  
102 **will be organic, and** NMR analyses of ambient aerosol samples show that aerosols arising  
103 from the ice-free Southern Ocean are rich in lipids and sugars, and aerosols arising from  
104 coastal areas are rich in sugars associated with plant vegetation (Decesari et al., 2020). **These**  
105 **sources are likely primary**, and the primary aerosol sources are therefore many and varied  
106 across Antarctica.”

- 107 2. In the paragraph about the Halley data (lines 238 to 244), please state that this same  
108 cluster analysis has already been applied to the Halley data and published in Lachlan-  
109 Cope et al. (2020).

110 Thank you for the suggestion. We include it in fact at the start of our discussion of k-means  
111 cluster analysis

112 “k-means Cluster Analysis was applied to the PNSD data to apportion the PNSDs according  
113 to their shape (Beddows et al., 2009), and is routinely applied in pristine environments to  
114 PNSD data (Dall’Osto et al., 2017b, 2019b; Lachlan-Cope et al., 2020), **including the Halley**  
115 **dataset included in this paper (Lachlan-Cope et al., 2020).”**

- 116 3. Please define the parameters in Equation 1.

117 This section now reads as follows

118 “The condensation sink ( $CS$ ,  $s^{-1}$ ) represents the rate at which a vapour phase molecule will  
119 collide with pre-existing particle surface, and was calculated from the PNSD data as follows  
120 (Kulmala et al., 2012):

121 
$$CS = 2\pi D \sum_{d_p} \beta_{m,d_p} d_p N_{d_p} \quad (1)$$

122 Here,  $D$  represents the diffusion coefficient of the condensing vapor, which is assumed to be  
123 sulfuric acid. The transitional regime correction factor is denoted by  $\beta_{m,d_p}$ ,  $d_p$  is the diameter  
124 of a measurement bin, and  $N_{d_p}$  is the number of particles in size bin  $d_p$ .”

125 4. Please list the cluster types in the same order in the text and the figures. For example,  
126 they are listed in one order in lines 313-314, in a different order in the paragraphs in  
127 lines 320 to 348, and in yet another order in Figure 4.

128 Thanks for pointing this out – we have amended this throughout (and slightly tidied up Figure  
129 3 also).

130 5. I find the name Bursting confusing because I think of bubble bursting but you are using  
131 it to mean new particles that fail to grow. In fact, you use bursting in both senses in the  
132 paragraph on lines 485 to 497. Is it possible to change the name of this cluster?

133 We opt to keep the name of this cluster the same for the sake of consistency with literature,  
134 but we do now note this in the text

135 “Note, the name “bursting” refers to “bursts” in particle number concentrations due to  
136 secondary formation, rather than bubble bursting.”

137 6. I would refer to Figures S4 and S5 at the end of line 357.

138 We have included this.

139 7. Lines 378-379: Is the increased contribution of Nucleation and Bursting in September  
140 due to the sun returning?

141 NPF is indeed likely a function of photochemistry, as nighttime NPF is essentially unheard  
142 of, with only a few instances in urban areas (where primary precursor emissions or  $\text{NO}_3^-$   
143 chemistry are likely the culprit). We don’t explicitly make this observation as we don’t want  
144 to make any unfounded mechanistic interpretations.

145 8. In lines 107 to 114, you talk about the debate between upper troposphere NPF and  
146 boundary layer NPF. On lines 429-430, you note that trajectories corresponding to  
147 Nucleation have a lower than average height. Does this provide an answer to the  
148 debate? You don’t come back to this observation in the discussion.

149 No, unfortunately we don’t think so. Upper-tropospheric NPF followed by transportation  
150 down to the measurement site could result in many different shapes of PNSD, in fact, this is  
151 one of the key uncertainties in the *Aitken* and *bursting* PNSDs, which we highlight as follows

152 “*Aitken high, Aitken low, and bimodal* PNSDs occur 37-68% of the time, most commonly at  
153 Dome C on the Antarctic Plateau, and likely arise from atmospheric transport and aging from  
154 aerosol originating likely in both coastal boundary layer and free troposphere”

155 Further, the number of PNSDs falling into the *nucleation* cluster at Dome C is actually quite  
156 small, which we now highlight as follows

157 “All trajectories corresponding to Nucleation PNSDs have a lower-than-average trajectory  
158 height, although the total number of trajectories this corresponds to is relatively small (Figure  
159 S10).”

160 9. Line 489: Can you explain briefly what the Hoppel minimum is?

161 Good suggestion we have done this as follows

162 “The two initial clusters differ slightly because of the Hoppel minimum at 55 nm and 75 nm,  
163 respectively; the Hoppel minimum refers to a specific dip in the number concentration of  
164 aerosol particles at these sizes, suggesting variations in particle stability, growth, or origin.”

165 10. Figure 1. Why not show the ice extent in 2015 rather than the 30-year average?

166 Thanks, we have done this and include the figure below here:

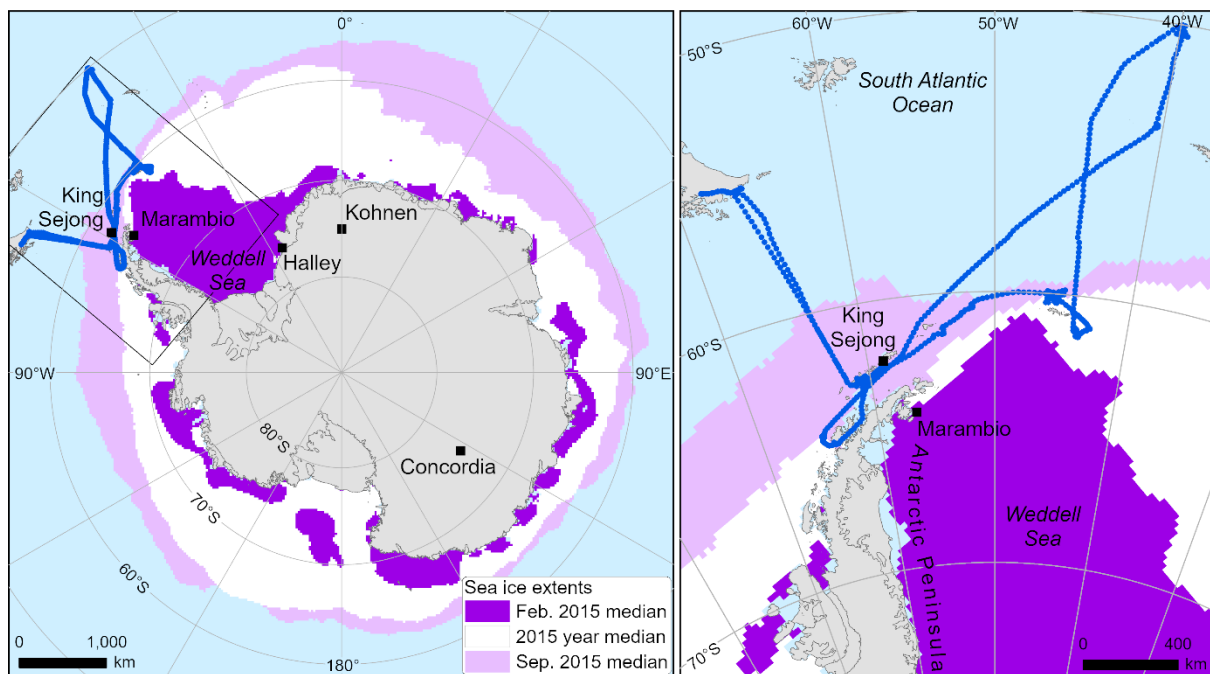

167  
168 Figure 1: Map of the sampling stations (Halley, Marambio, Concordia/Dome C, King Sejong) for the  
169 year dataset collected in 2015. Additional, data for shorter period are intercompared at Kohnen (Weller  
170 et al., 2018) and during the PEGASO cruise (Dall’Osto et al., 2017, blue line the PEGASO cruise track).  
171 The February sea ice extent signifies the annual minimum, while the September median signifies the  
172 annual maximum (data are from the National Snow and Ice Data Center – NSIDC – at  
173 <https://nsidc.org/data/>, last access: 30 July 2024, Fetterer et al., 2017).

174

175 11. Figure 3a: I would like to see a comparison of the Halley cluster distribution from this  
176 work with the one derived in Lachlan-Cope et al. (2020), maybe in a figure in the SI.  
177 I’m curious whether the distribution of clusters changes when you include data from the  
178 other sites.

179 We provide a comparison of the two datasets below. The top panel is lifted from Lachlan-  
180 Cope et al. (2020), while the below is constructed from our analyses. The main difference is



181 the *bursting* PNSDs, which are bimodal in our data, but monomodal in Lachlan-Cope et al.  
 182 (2020).

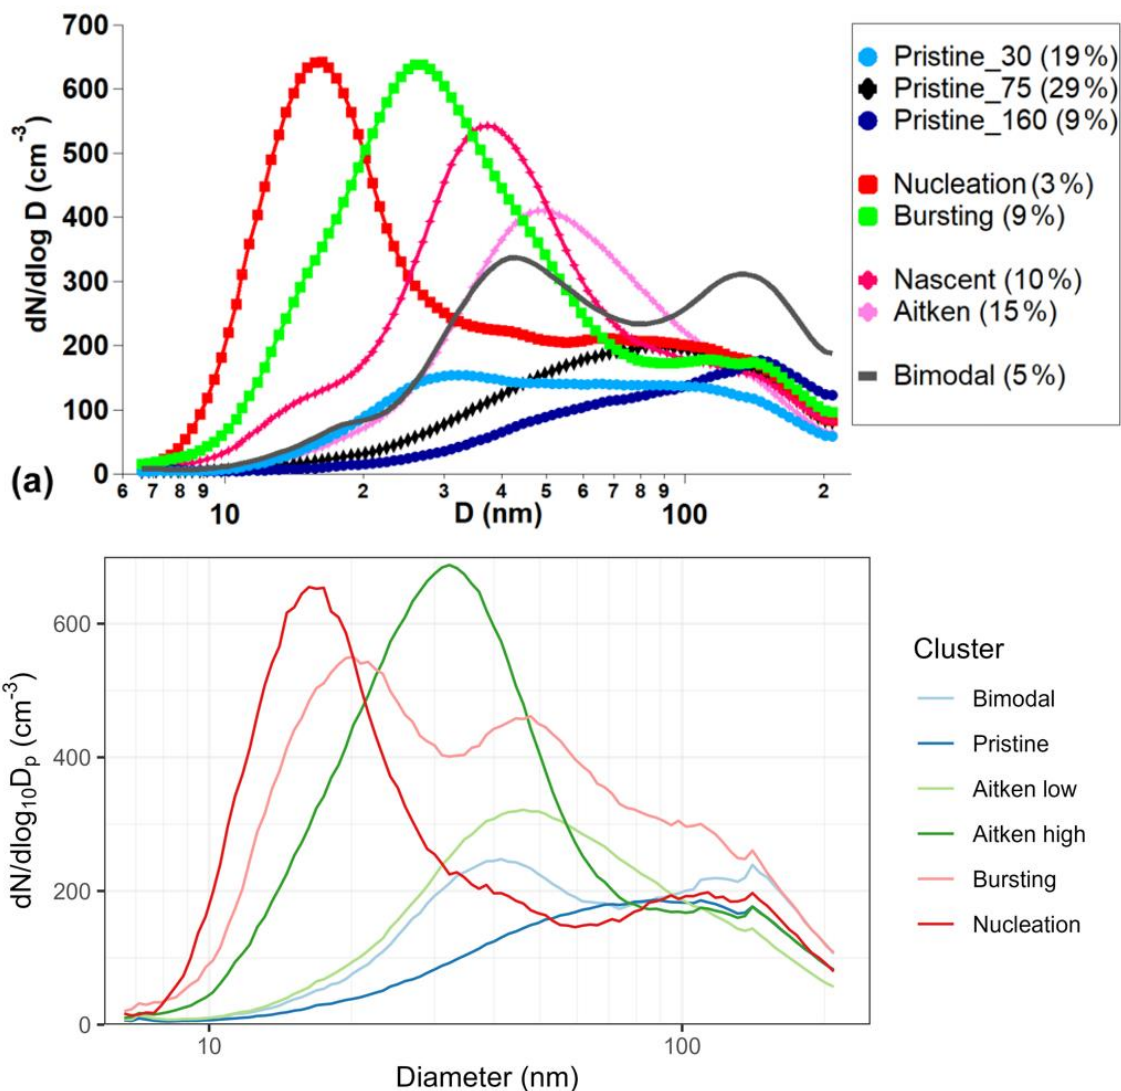

183

184 12. Figure 4. Is panel a) useful? Since Dome C is entirely over Land, it seems like averaging  
 185 all 4 sites together just dampens any pattern among the different clusters. It might make  
 186 more sense to show the average across clusters for each site since you discuss that in the  
 187 text, i.e., add a 7<sup>th</sup> column for the average for each of the 4 sites. Can you use the same  
 188 names in the legend as in the text, e.g., “Sea ice” rather than “Consolidated pack ice”?  
 189 Can you shift the names of the clusters slightly left so they are under the tick marks?

190 Good suggestions. All this has been done, although we retain panel (a) as we still argue the  
 191 average is useful. Please see the below figure.

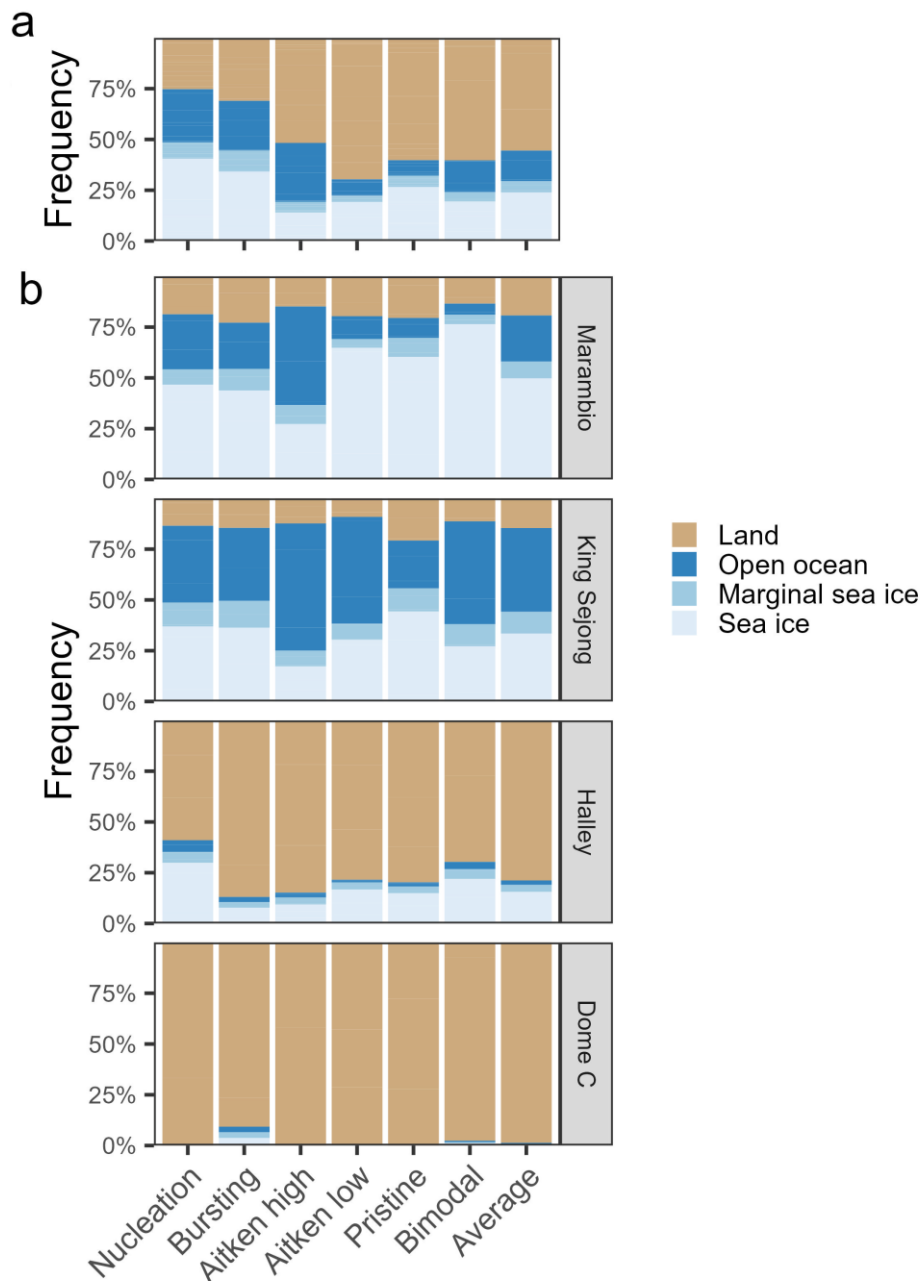

192

193 *Figure 4: Land surface types associated with each cluster, showing (a) average association*  
 194 *across all sites, and (b) association per site. “Average” is the mean of all clusters.*

195 13. Figure 6. I would use more distinct colors for the different sites. Weddell is spelled with  
 196 two l's.

197 We have fixed this figure, please see below

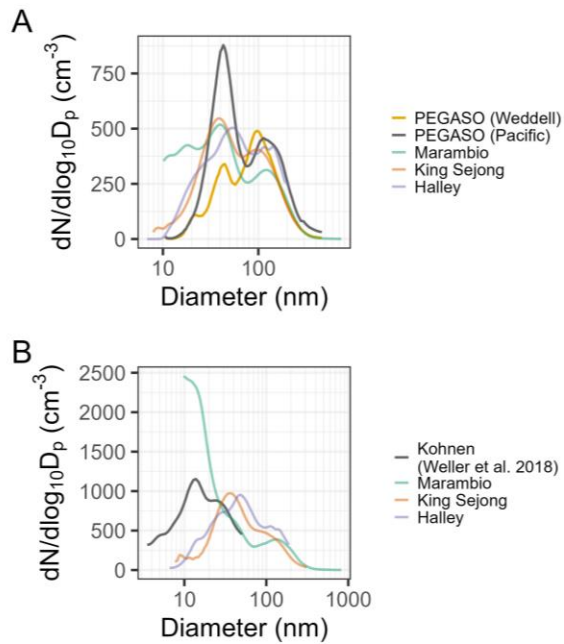

198  
 199 *Figure 6: PNSD intercomparisons: (a) PNSD from the PEGASO cruise both when influenced*  
 200 *from air masses from the Weddell Sea and Pacific Ocean and the stations used for this study*  
 201 *where overlapping data are available (Marambio, Halley and King Sejong stations), and (b)*  
 202 *PNSD from the Kohnen station (Weller et al., 2018) and the stations used for this study where*  
 203 *overlapping data are available (Marambio, Halley and King Sejong stations)*

204 14. Figure S6. A sentence is duplicated in the caption.

205 [Thanks, this has been amended](#)

206 15. References: Heinrichs is out of order and the two Humphries references are in the list  
 207 twice.

208 [This has been amended.](#)



209

210 **Reviewer: 2**

211 In this study, the authors, have studied the particle number size distribution collected for one  
212 year in several stations in the Antarctic region plus some additional  
213 campaigns/measurements. They have found that the four different stations have very different  
214 size distribution possibly highlighting different sources. All the data are analysed with the k-  
215 means cluster analysis, a very common method often used by these authors. With this method  
216 they have identified six main categories (Nucleation, Bursting, Aitken high, Aitken low,  
217 Bimodal and Pristine).

218 The data analysis is well done and interesting however is not clear from the data analysis how  
219 they could get to their conclusions (Schematic Figure 7). Such as: “We provide evidence that  
220 both primary and secondary components from pelagic and sympagic regions strongly  
221 contribute to the annual seasonal cycle of Antarctic aerosols which add insight on the  
222 possible sources of aerosol production/activity in the whole Antarctic region.” I find it hard to  
223 connect the final schematic with the data analysis done in the study. I do understand that  
224 PSND can’t give you too much information on biological processes and chemistry. Finally, it  
225 is not really clear the advancement of this study compared to Lachlan-Cope et al., (2020).

226 My concern are clearly not major and probably with some change in the text and some  
227 “toning down” of the conclusions/results should be fine. I therefore think that it is a very  
228 good paper and deserve to be published in this journal.

229 Thanks for the comment. Firstly, we have rewritten out abstract to both be more concise, and  
230 to remove the overreaching conclusions. The new abstract reads as follows (important change  
231 to our wording in **bold**):

232 *“In order to reduce the uncertainty of aerosol radiative forcing in global climate models, we*  
233 *need to better understand natural aerosol sources which are important to constrain the*  
234 *current and pre-industrial climate. Here, we analyze Particle Number Size Distributions*  
235 *(PNSD) collected during a year (2015) across four coastal and inland Antarctic research*  
236 *bases (Halley, Marambio, Dome C and King Sejong). We utilise k-means cluster analysis to*  
237 *separate the PNSD data into six main categories. Nucleation and Bursting PNSDs occur 28-*  
238 *48% of the time between sites, most commonly at coastal sites Marambio and King Sejong*  
239 *where air masses mostly come from the west and travel over extensive regions of sea ice,*  
240 *marginal ice, and open ocean, and likely arise from new particle formation. Aitken high,*  
241 *Aitken low, and bimodal PNSDs occur 37-68% of the time, most commonly at Dome C on the*  
242 *Antarctic Plateau, and likely arise from atmospheric transport and aging from aerosol*  
243 *originating likely in both coastal boundary layer and free troposphere. Pristine PNSDs with*  
244 *low aerosol concentrations occur 12-45% of the time, most common at Halley located at low*  
245 *altitudes and far from the coastal melting ice and influenced by air masses from the west. We*  
246 ***infer** that both primary and secondary components from pelagic and sympagic regions*  
247 *strongly contribute to the annual seasonal cycle of Antarctic aerosols. Our simultaneous*  
248 *aerosols measurements stress the importance of the variation in atmospheric*  
249 *biogeochemistry across the Antarctic region.”*

250 We expand on this in the following sentences,

251 “Our study shows that the aerosol PNSDs across the Antarctic have striking differences,  
252 likely due to multiple eco-regions and subsequent atmospheric chemical and physical  
253 processes act as multiple aerosol sources around Antarctica.”

254 These statements are made at the end of our introduction,

255 “We show a prevalence of new particle formation at the coastal sites, and associate this new  
256 particle formation with air masses flowing over regions of sea ice and ocean. At the more  
257 southerly and inland sites, primary particles dominate the particle number concentrations,  
258 while air masses primarily travel over regions of land. Ambiguity remains in this analysis, as  
259 some PNSD clusters likely contains a substantial contribution from primary and secondary  
260 processes. Nonetheless, we provide further evidence for the roles of emissions from sympagic  
261 and pelagic ocean regions in new particle formation, and highlight the many and varied  
262 sources of particles across Antarctica.”

263 Minor comments:

264 I have a question about the K-means clustering. How does it perform when the instruments  
265 have different cut-off (as the one shown in this study)? Especially in the nucleation mode  
266 where a small change in the cut-off can have a big impact on the particle number.

267 Great question. We decided not to give our instruments a common size range as the clustering  
268 works best when it has as much information as possible, however, some of the instruments  
269 have min cutoffs at 10 nm, others at lower diameters. We quickly re-analysed our Halley data  
270 (which has a min size of 6.6 nm), setting the number of clusters to just 5 (for ease of  
271 visualisation) and applied k-means cluster analysis twice, the second time we cut the smallest  
272 bins out, so our size distribution begins at 10 nm. The shapes of the resultant PNSD clusters  
273 are much the same, so we believe this makes not too much difference in our analyses.

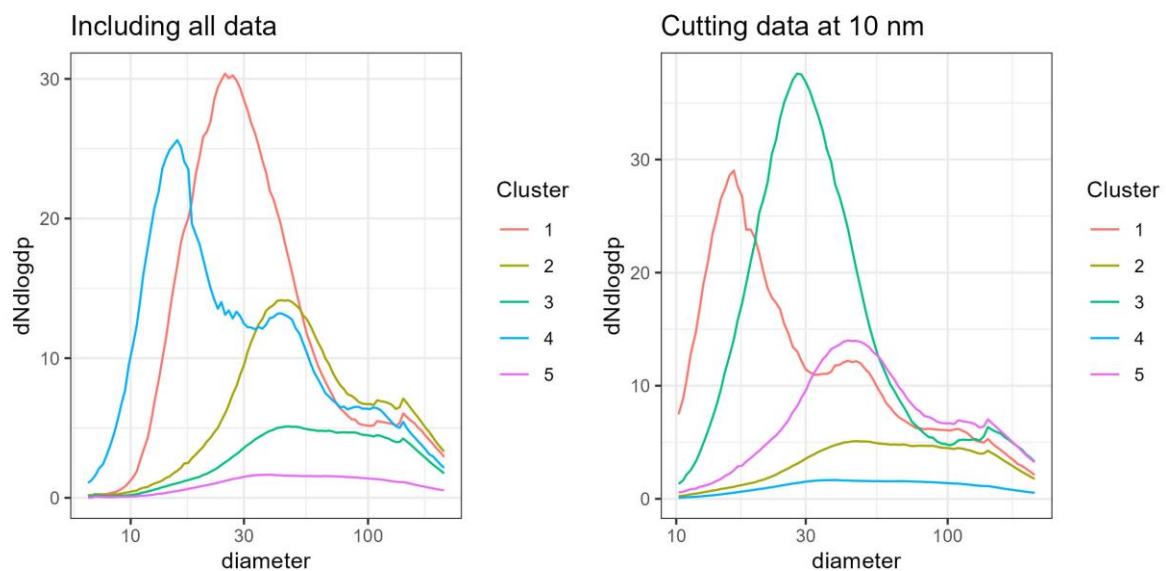

274

275 Specify acronym such as VOC, DMS and so on.

276 Thank you, we have done this throughout

277 It feels that the discussion related to new particle formation around line 600-625 belongs  
278 more to the introduction than the results. I would consider of moving that part there.

279 [Great, thanks for the suggestion, this has now been done.](#)

280 I'm a bit puzzle by this statement in the code and data availability section: "The code and  
281 data used to produce all non-illustrative figures are available from the corresponding authors  
282 under reasonable request." What does it mean reasonable request? Shouldn't all the data and  
283 code be in a repository freely accessible. I think it's important to have these very important  
284 data (and possibly code) open access.  
285

286 [We aim to be as open as possible with our research materials. Researchers can request access  
287 by contacting the corresponding author, and we'll provide the data and code, following the  
288 guidelines set by those who collected each individual dataset.](#)
